# Supplementary material
Source: PubMed Central journal article supplement (PMC4986927)
Supplement: NIHMS805350-supplement-Supplemental_Data.pdf [file NIHMS805350-supplement-Supplemental_Data.pdf]

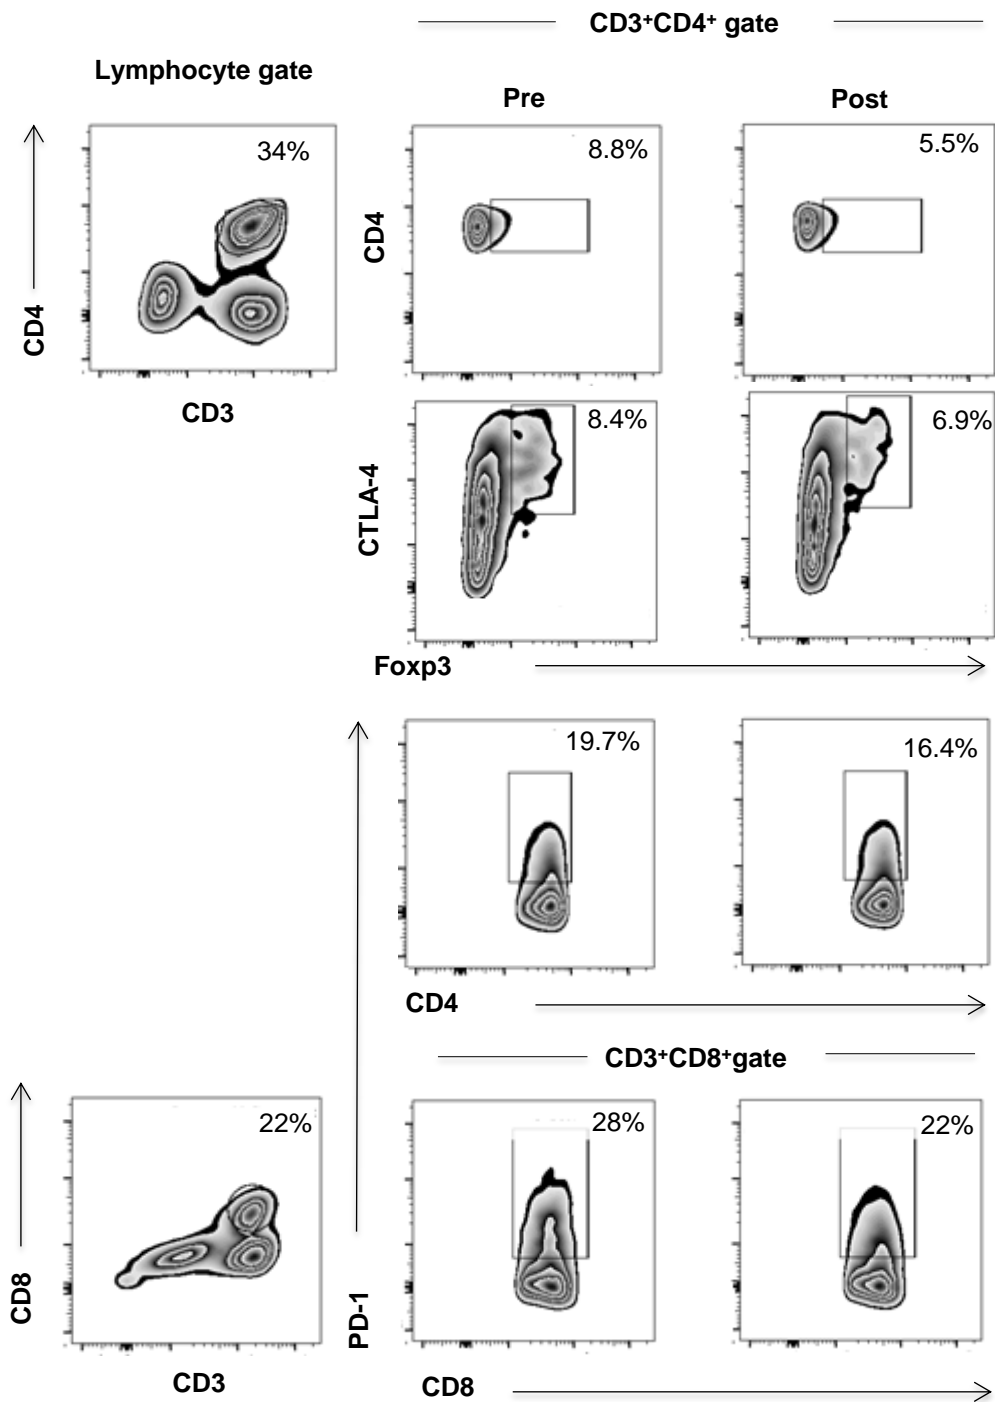

**Supplementary Figure 1A.**

**Figure S1A.** Representative flow cytometry analysis of PBMC from HCC patients showing the gating strategies utilized. Zebra plot analyses were gated on FSC/SSC and subsequently gated on CD3<sup>+</sup>CD4<sup>+</sup> / CD3<sup>+</sup>CD8<sup>+</sup> cells and the percentages of CD4<sup>+</sup>Foxp3<sup>+</sup> T cells, Foxp3<sup>+</sup> CTLA-4<sup>+</sup> T cells, CD4<sup>+</sup>PD-1<sup>+</sup> T cells and CD8<sup>+</sup>PD-1<sup>+</sup> T cells before and after treatment with sorafenib are shown. The percentage of cells is indicated in the upper right corner of each plot.

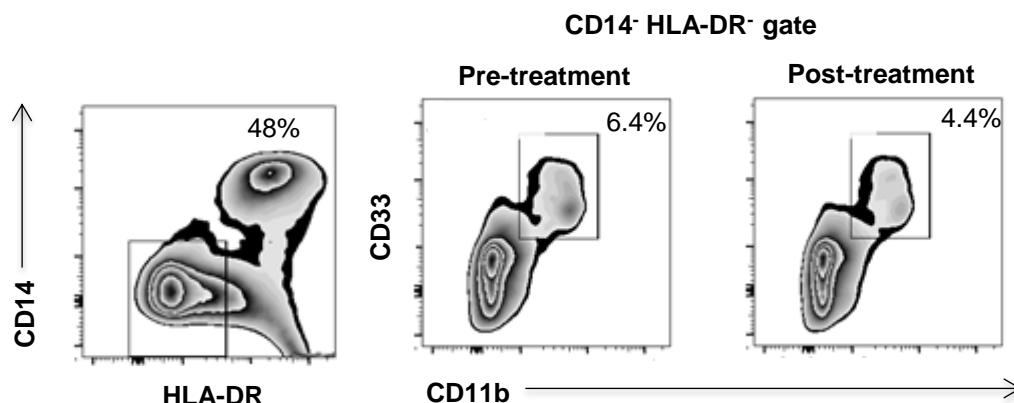

**Supplementary Figure 1B.**

**Figure S1B.** Representative flow cytometry analysis of PBMC from HCC patients showing the gating strategies applied for MDSC analysis. Zebra plot analyses were gated on FSC/SSC and subsequently gated on CD14<sup>+</sup>/HLA-DR<sup>+</sup> cells and the percentages of CD11b<sup>+</sup>CD33<sup>+</sup> MDSCs pre and post treatment with sorafenib are shown. The percentage of cells is indicated in the upper right corner of each plot.

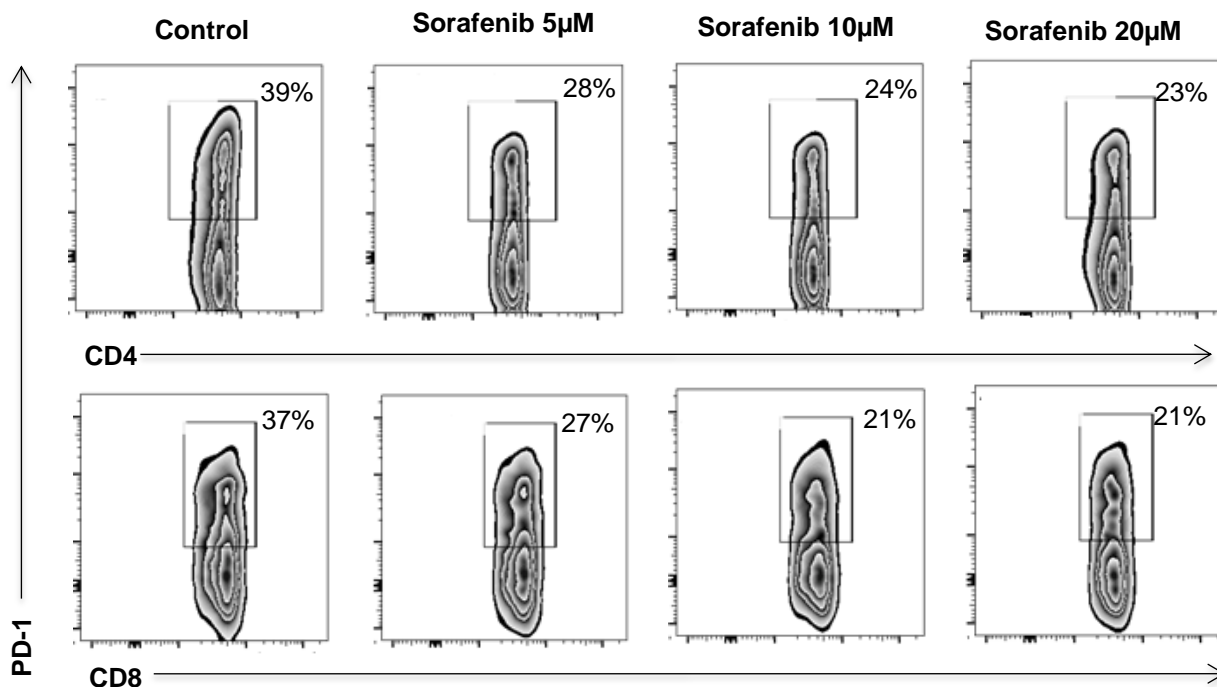

**Supplementary Figure 1C.**

**Figure S1C.** In vitro dose response experiments of sorafenib. Unsorted T cells from PBMC were activated via the TCR in the presence or absence of varying concentrations of sorafenib 5μM, 10μM and 20μM in vitro for 48 hours and PD-1 expression on gated CD3<sup>+</sup>CD4<sup>+</sup> and CD3<sup>+</sup>CD8<sup>+</sup> T cells were determined by flow cytometry. The percentage of cells is indicated in the upper right corner of each plot.

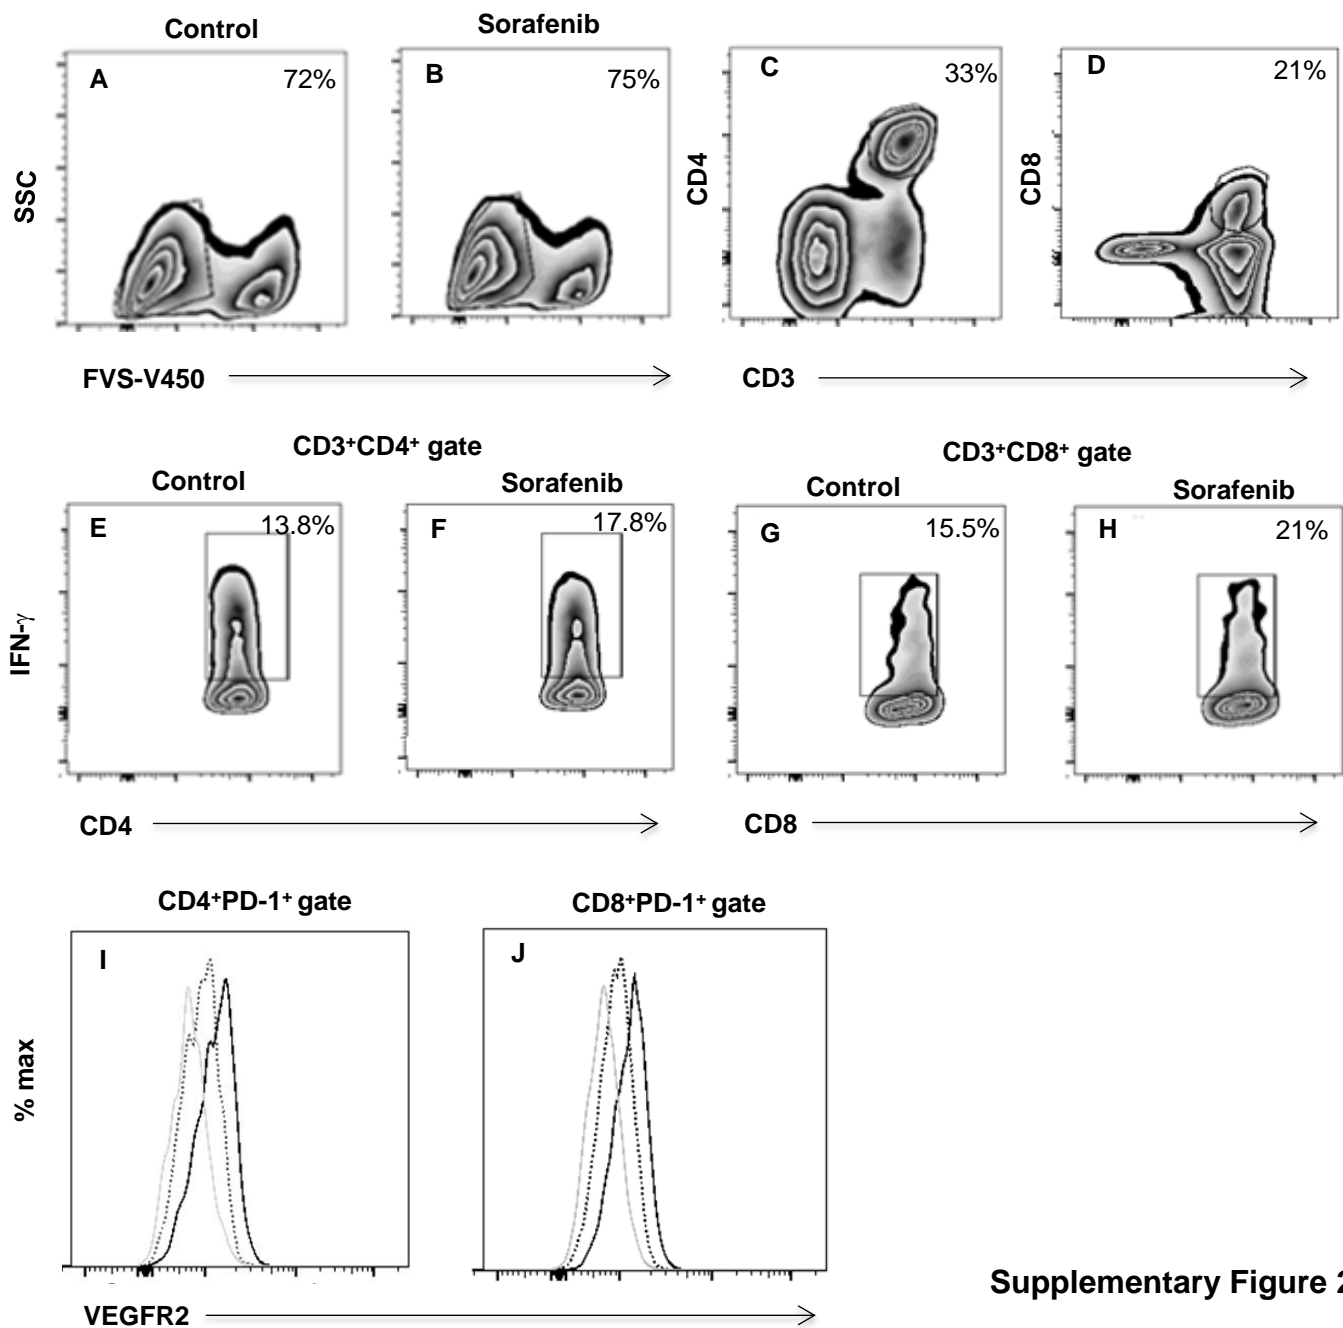

**Supplementary Figure 2.**

**Figure S2.** Representative flow cytometry analysis of in vitro experiments using PBMC from HCC patients. Pre-treatment samples from HCC patients were stimulated with anti-CD3/CD28 in the presence or absence of 10  $\mu$ M concentration of sorafenib or 10  $\mu$ g/ml anti-VEGF antibody in vitro for 48 hrs as described in supplementary methods. Multi-color flow cytometry was done using viability exclusion dye FVS-V50 along with other fluorophores. Zebra plot analyses were gated on FSC/SSC, SSC/ FVS-V450 (**A**, **B**) and subsequently gated on CD3<sup>+</sup>CD4<sup>+</sup> / CD3<sup>+</sup>CD8<sup>+</sup> T cells (**C**, **D**). The frequencies of CD4<sup>+</sup>IFN- $\gamma$ <sup>+</sup> (**E**, **F**) and CD8<sup>+</sup>IFN- $\gamma$ <sup>+</sup> (**G**, **H**) T cells in anti-CD3/CD28 treated (control) and anti-CD3/CD28 + sorafenib treated PBMC are shown. The percentage of cells is indicated in the upper right corner of each plot. Same experimental setting as in **A-H** but showing representative staining for VEGF-R2 are histogram overlays **I** and **J** gated on CD4<sup>+</sup>PD-1<sup>+</sup> and CD8<sup>+</sup>PD-1<sup>+</sup> T cells respectively. Reduced VEGF-R2 expression observed in CD4<sup>+</sup>PD-1<sup>+</sup>/CD8<sup>+</sup>PD-1<sup>+</sup> T cells treated with sorafenib (dotted line) and anti-VEGF antibody (grey line) as compared to untreated control (black line).

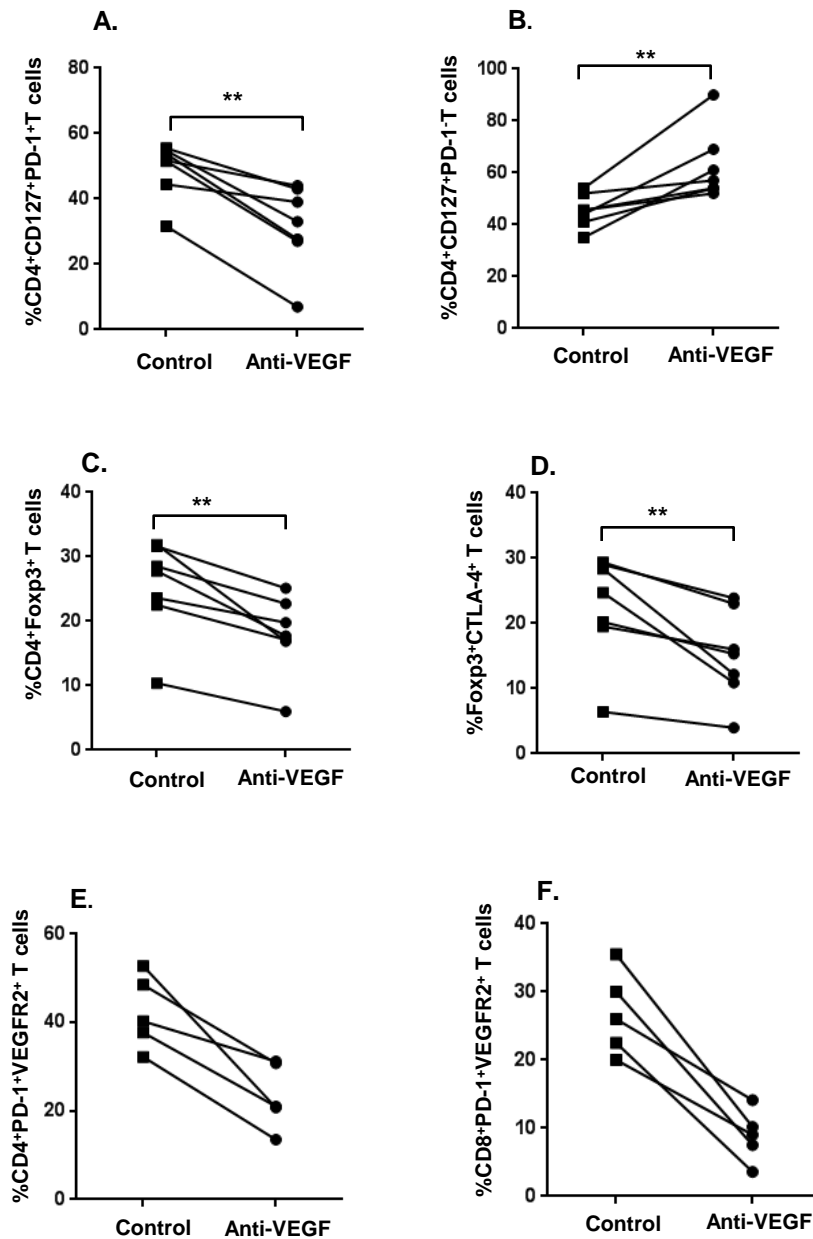

**Supplementary Figure 3.**

**Figure S3. Effect of *in vitro* treatment with anti-VEGF antibody on T effector cells and Tregs.** Pre-treatment samples of PBMCs from HCC patients were stimulated with anti-CD3/CD28 in the presence or absence of 10 $\mu$ g concentration of anti-VEGF antibody *in vitro* for 48 hrs and the frequencies of (A) CD4<sup>+</sup>CD127<sup>+</sup>PD-1<sup>+</sup> T effector cells (B) CD4<sup>+</sup>CD127<sup>+</sup>PD-1<sup>-</sup> T cells (C) CD4<sup>+</sup>Foxp3<sup>+</sup> Tregs (D) Foxp3<sup>+</sup>CTLA-4<sup>+</sup> Tregs (E) CD4<sup>+</sup>PD-1<sup>+</sup>VEGFR2<sup>+</sup> T cells (F) CD8<sup>+</sup>PD-1<sup>+</sup>VEGFR2<sup>+</sup> T cells were determined by flow cytometry as described in methods. Each symbol represents an individual HCC patient anti-CD3/CD28 treated control (■) or anti-VEGF anti-body treated PBMC (●). \*\**P* < 0.005, paired *t*-test, (n=7 for A-D, n=5 for E and F).

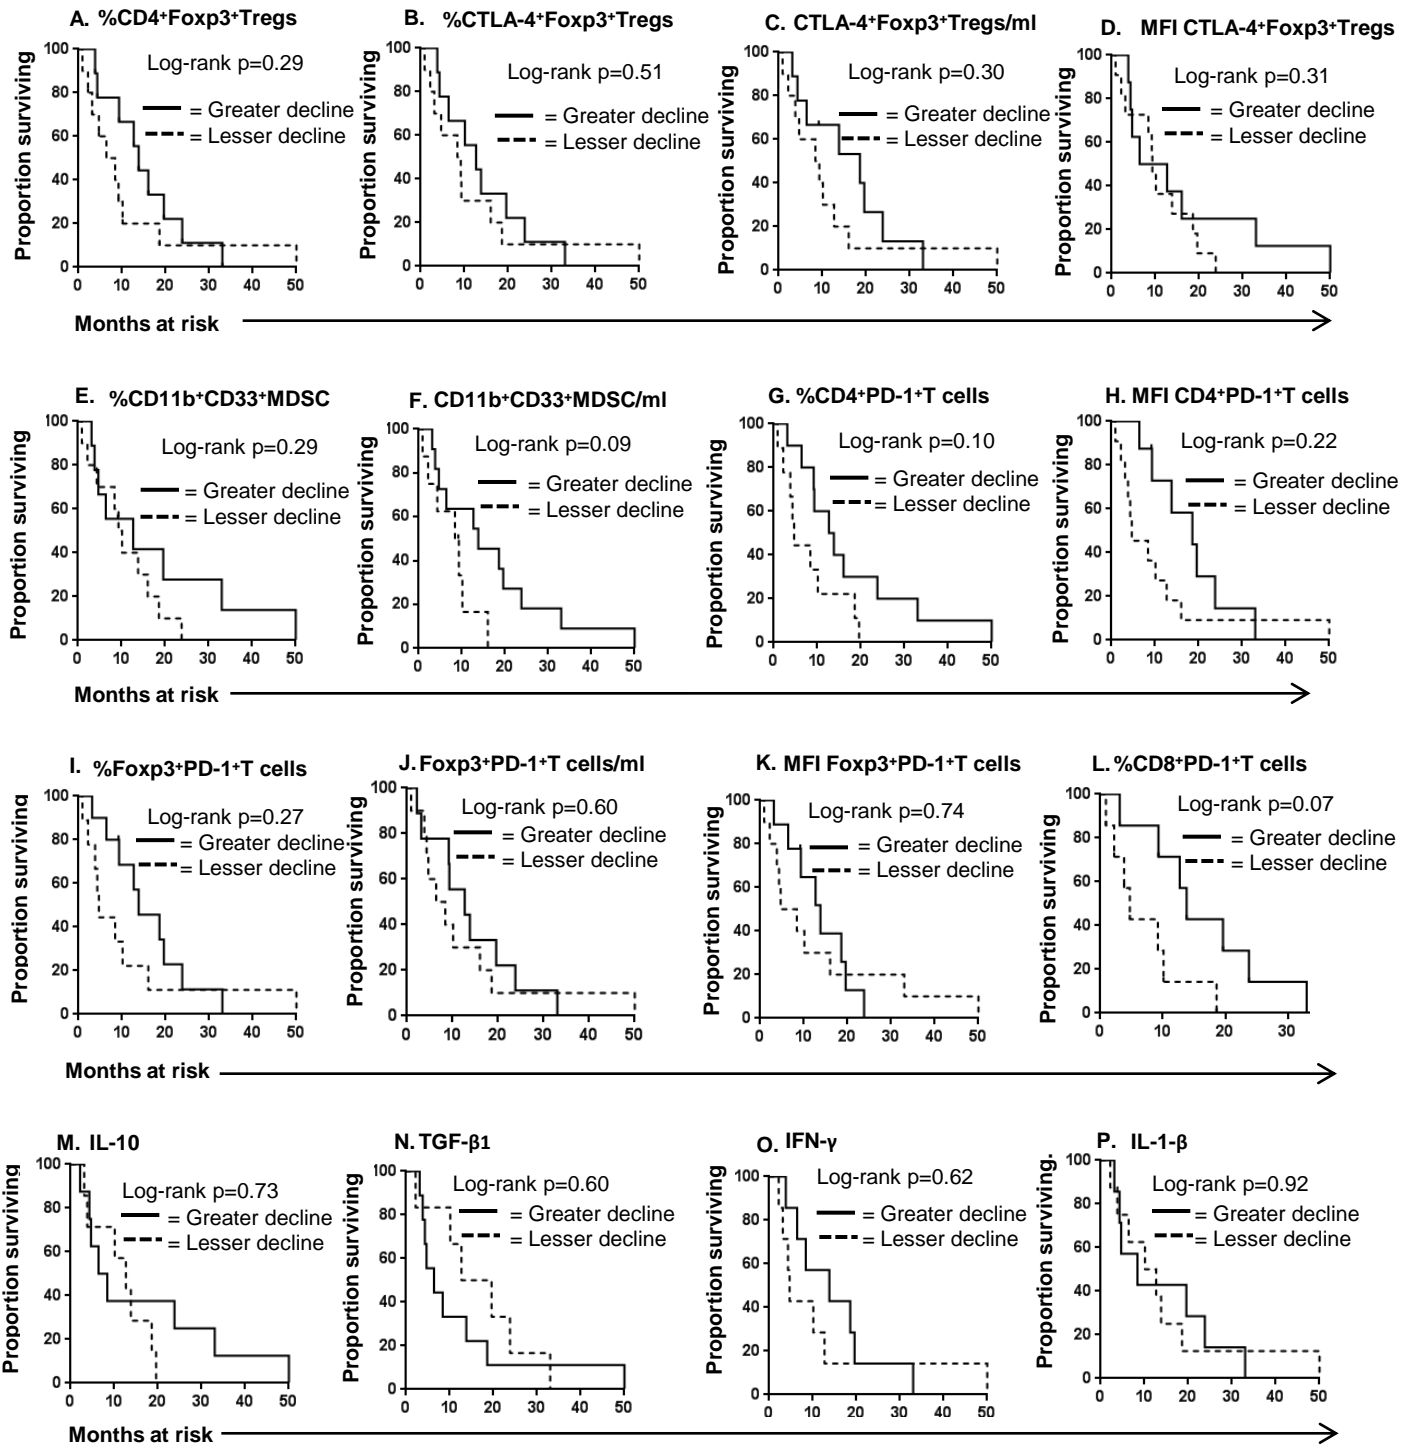

**Supplemental Figure 4.**

**Figure S4. Kaplan-Meier plots showing the association of decrease in immunosuppressive cells and patient outcome after sorafenib treatment.** The association between overall survival (OS) and immune parameters of HCC patients was calculated based on the ratio of post vs pre- treatment measurements of immune markers for each patient as described in methods. (A) frequency of CD4<sup>+</sup>Foxp3<sup>+</sup> Tregs (B) frequency of CTLA-4<sup>+</sup>Foxp3<sup>+</sup> Tregs (C) absolute number of CTLA-4<sup>+</sup>Foxp3<sup>+</sup> Tregs/ml (D) expression levels of CTLA-4 (MFI) on Foxp3<sup>+</sup> Tregs (E) frequency of CD11b<sup>+</sup>CD33<sup>+</sup> MDSC (F) absolute number of CD11b<sup>+</sup>CD33<sup>+</sup> MDSC/ml (G) frequency of CD4<sup>+</sup>PD-1<sup>+</sup> T cells (H) expression levels of PD-1 (MFI) on CD4<sup>+</sup> T cells (I) frequency of Foxp3<sup>+</sup>PD-1<sup>+</sup> T cells (J) absolute number of Foxp3<sup>+</sup>PD-1<sup>+</sup> T cells/ml (K) expression levels of PD-1 (MFI) on Foxp3<sup>+</sup>CD4<sup>+</sup> T cells (L) frequency of CD8<sup>+</sup>PD-1<sup>+</sup> T cells (M) IL-10 (N) TGF- $\beta$ 1 (O) IFN- $\gamma$  (P) IL-1 $\beta$ .

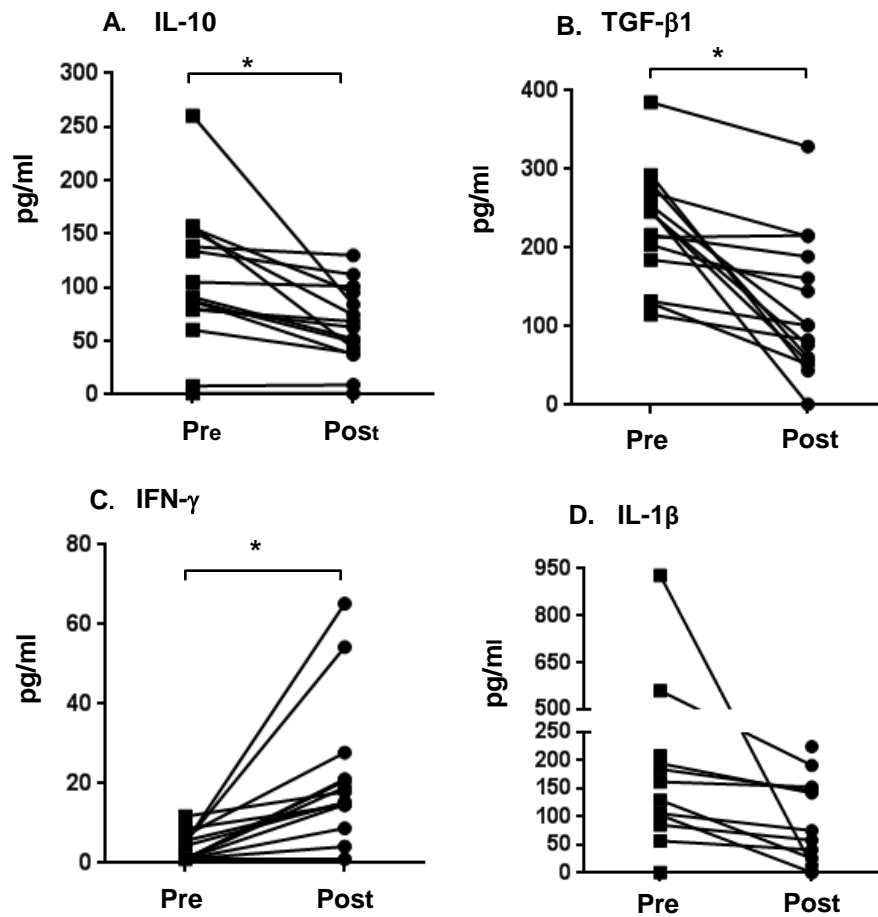

**Supplementary Figure 5.**

**Figure S5. Changes in the plasma levels of cytokines in HCC patients after sorafenib treatment.** (A) IL-10, (B) TGF-β1, (C) IFN-γ and (D) IL-1β. Each symbol represents an individual HCC patient pre (■) or post sorafenib treatment (●). \*  $P < 0.05$ , Permutation  $t$ -test.

**Supplementary Figure S1A.** Representative flow cytometry analysis of PBMC from HCC patients showing the gating strategies utilized. Zebra plot analyses were gated on FSC/SSC and subsequently gated on CD3<sup>+</sup>CD4<sup>+</sup> / CD3<sup>+</sup>CD8<sup>+</sup> cells and the percentages of CD4<sup>+</sup>Foxp3<sup>+</sup> T cells, Foxp3<sup>+</sup> CTLA-4<sup>+</sup> T cells, CD4<sup>+</sup>PD-1<sup>+</sup> T cells and CD8<sup>+</sup>PD-1<sup>+</sup> T cells before after treatment with sorafenib are shown. The percentage of cells is indicated in the upper right corner of each plot.

**Supplementary Figure S1B.** Representative flow cytometry analysis of PBMC from HCC patients showing the gating strategies applied for MDSC analysis. Zebra plot analyses were gated on FSC/SSC and subsequently gated on CD14<sup>-</sup>/HLA-DR<sup>-</sup> cells and the percentages of CD11b<sup>+</sup>CDD3<sup>+</sup> MDSCs before and after treatment with sorafenib are shown. The percentage of cells is indicated in the upper right corner of each plot.

**Supplementary Figure S1C.** In vitro dose response of sorafenib. Unsorted T cells from PBMC were activated via the TCR in the presence or absence of varying concentrations of sorafenib 5μM, 10μM and 20μM in vitro for 48 hours and PD-1 expression on gated CD3<sup>+</sup>CD4<sup>+</sup> and CD3<sup>+</sup>CD8<sup>+</sup> T cells were determined by flow cytometry. The percentage of cells is indicated in the upper right corner of each plot.

**Supplementary Figure S2.** Representative flow cytometry analysis of in vitro experiments using PBMC from HCC patients. Pre-treatment samples of PBMCs from HCC patients were stimulated with anti-CD3/CD28 in the presence or absence of 10 μM concentration of sorafenib or 10μg/ml anti-VEGF antibody in vitro for 48 hrs as described in supplementary methods. Multi-color flow cytometry was done using viability exclusion dye FVS-V50 along with other fluorophores. Zebra plot analyses were gated

on FSC/SSC, SSC/FVS-V450 (**A, B**) and subsequently gated on CD3<sup>+</sup>CD4<sup>+</sup> /CD3<sup>+</sup>CD8<sup>+</sup> T cells (**C, D**). The frequencies of CD4<sup>+</sup>IFN- $\gamma$ <sup>+</sup> (**E, F**) and CD8<sup>+</sup>IFN- $\gamma$ <sup>+</sup> (**G, H**) T cells in anti-CD3/CD28 treated (control) and anti-CD3/CD28 + sorafenib treated PBMC are shown. The percentages of cells is indicated in the upper right corner of respective plots. Same experimental setting as in **A-H** but showing representative staining for VEGF-R2 are histogram overlays **I** and **J** gated on CD4<sup>+</sup>PD-1<sup>+</sup> and CD8<sup>+</sup>PD-1<sup>+</sup> T cells respectively. Reduced VEGF-R2 expression observed in CD4<sup>+</sup>PD-1<sup>+</sup>/CD8<sup>+</sup>PD-1<sup>+</sup> T cells treated with sorafenib (dotted line) and anti-VEGF antibody (grey line) as compared to untreated control (black line).

**Supplementary Figure S3. Effect of in vitro treatment of anti-VEGF antibody on T effector cells and Tregs.** Pre-treatment samples of PBMCs from HCC patients were stimulated with anti-CD3/CD28 in the presence or absence of 10 $\mu$ g concentration of anti-VEGF antibody in vitro for 48 hrs and the frequencies of (**A**) CD4<sup>+</sup>CD127<sup>+</sup>PD-1<sup>+</sup> T effector cells (**B**) CD4<sup>+</sup>CD127<sup>+</sup>PD-1<sup>-</sup> T cells (**C**) CD4<sup>+</sup>Foxp3<sup>+</sup> Tregs (**D**) Foxp3<sup>+</sup>CTLA-4<sup>+</sup> Tregs (**E**) CD4<sup>+</sup>PD-1<sup>+</sup>VEGFR2<sup>+</sup> T cells (**F**) CD8<sup>+</sup>PD-1<sup>+</sup>VEGFR2<sup>+</sup> T cells were determined by flow cytometry as described in methods. Each symbol represents an individual HCC patient; anti-CD3/CD28 treated control (■) or anti-VEGF anti-body treated PBMC (●). \*\* $P < 0.005$ , paired  $t$ - test, (n=7 for **A-D**, n=5 for **E** and **F**).

**Supplementary Figure S4. Kaplan-Meier plots showing the association of decrease in immunosuppressive cells and patient outcome after sorafenib treatment.** The association between overall survival (OS) and immune parameters of HCC patients was calculated based on the ratio of post vs pre-treatment measurements of immune markers for each patient as described in methods. (**A**) frequency of

CD4<sup>+</sup>Foxp3<sup>+</sup> Tregs (**B**) frequency of CTLA-4<sup>+</sup>Foxp3<sup>+</sup> Tregs (**C**) absolute number of CTLA-4<sup>+</sup>Foxp3<sup>+</sup> Tregs/ml (**D**) expression levels of CTLA-4 (MFI) on Foxp3<sup>+</sup> Tregs (**E**) frequency of CD11b<sup>+</sup>CD33<sup>+</sup> MDSC (**F**) absolute number of CD11b<sup>+</sup>CD33<sup>+</sup> MDSC/ml (**G**) frequency of CD4<sup>+</sup>PD-1<sup>+</sup> T cells (**H**) expression levels of PD-1 (MFI) on CD4<sup>+</sup> T cells (**I**) frequency of Foxp3<sup>+</sup>PD-1<sup>+</sup> T cells (**J**) absolute number of Foxp3<sup>+</sup>PD-1<sup>+</sup> T cells/ml (**K**) expression levels of PD-1 (MFI) on Foxp3<sup>+</sup>CD4<sup>+</sup> T cells (**L**) frequency of CD8<sup>+</sup>PD-1<sup>+</sup> T cells (**M**) IL-10 (**N**) TGF- $\beta$ 1 (**O**) IFN- $\gamma$  (**P**) IL-1 $\beta$ .

**Figure S5. Changes in the plasma levels of cytokines in HCC patients after sorafenib treatment.** (**A**) IL-10, (**B**) TGF- $\beta$ 1, (**C**) IFN- $\gamma$  and (**D**) IL-1 $\beta$ . Each symbol represents an individual HCC patient pre (■) or post sorafenib treatment (●). \*  $P < 0.05$ , Permutation  $t$ -test.

## **Supplementary methods 1.**

### **Flow cytometry analysis**

FACS analysis was performed to measure peripheral blood Treg frequency using APC-H7 anti-CD3, V450 anti-CD4, V500 anti-CD8, PE anti-CD127, PE-Cy5 anti-CTLA4 (BD Biosciences) and PE-Cy7 anti-PD-1, Alexa488 anti-Foxp3 (Biolegend). Intracellular analysis for IFN- $\gamma$ , Foxp3 and CTLA-4 was performed after fixation and permeabilization of cells using intracellular staining kit (eBioscience) according to manufacturer's instructions. All samples were acquired on LSRII flow cytometer (BD Biosciences) and analyzed using Flowjo (Tree Star).

MDSCs were detected using FITC anti-CD11b (eBiosciences), PE-Cy5 anti-CD33, APC anti-CD14, V450 anti-HLA-DR (BD Biosciences).

### **Cytokine ELISA**

Plasma isolated during PBMC separation was assayed to quantify the level of IFN- $\gamma$ , IL-10, TGF- $\beta$ 1 and IL-1 $\beta$  using specific ELISA kits according to the manufacturer's instructions (eBioscience).

## **Supplementary methods 2.**

### **Cell culture**

PBMC ( $2.5 \times 10^5$  cells/well) were stimulated with anti-CD3 antibody (1 $\mu$ g/ml)/anti-CD28 (0.5 $\mu$ g/ml) in 96-well microtiter plates. Cells were treated with 10 $\mu$ M concentration of sorafenib or anti-VEGF antibody (10 $\mu$ g/ml). Control wells included

unstimulated cells and anti-CD3 stimulated cells without sorafenib or anti-VEGF antibody treatment. Plates were incubated at 37°C in a humidified incubator containing 5% CO<sub>2</sub> for 48 hrs. After incubation, cells were washed and stained for flow cytometry analysis.

### **Statistical analysis software**

All data analyses were generated using SAS/STAT software, Version 9.4. Copyright 2012, SAS Institute Inc. SAS is a registered trademark of SAS Institute Inc., Cary, NC, USA.

**Supplemental Table 1. Nominal and multiplicity-adjusted p values**

|                                                            |                                                                                                                                        | P Values |                 |
|------------------------------------------------------------|----------------------------------------------------------------------------------------------------------------------------------------|----------|-----------------|
| Figure                                                     | Marker                                                                                                                                 | Nominal  | Hommel Adjusted |
| Outcome: Mean Difference. Comparison: In vivo Post vs Pre  |                                                                                                                                        |          |                 |
| 1A                                                         | %CD4 <sup>+</sup> PD-1 <sup>+</sup> T cells                                                                                            | 0.015    |                 |
| 1B                                                         | CD4 <sup>+</sup> PD-1 <sup>+</sup> T cells/ml                                                                                          | 0.098    | 0.167           |
| 1C                                                         | CD4 <sup>+</sup> PD-1 MFI                                                                                                              | 0.021    |                 |
| 1D                                                         | %Foxp3 <sup>+</sup> PD-1 <sup>+</sup> T cells                                                                                          | 0.065    |                 |
| 1E                                                         | Foxp3 <sup>+</sup> PD-1 <sup>+</sup> T cells/ml                                                                                        | 0.041    | 0.164           |
| 1F                                                         | Foxp3 <sup>+</sup> PD-1 MFI                                                                                                            | 0.058    |                 |
| 1G                                                         | %CD4 <sup>+</sup> CD127 <sup>+</sup> T effector                                                                                        | 0.167    | 0.167           |
| 1H                                                         | CD4 <sup>+</sup> CD127 <sup>+</sup> PD-1 <sup>-</sup> T cells :<br>CD4 <sup>+</sup> Foxp3 <sup>+</sup> PD-1 <sup>+</sup> T cells ratio | 0.009    | 0.081           |
| 1I                                                         | % CD8 <sup>+</sup> PD-1 <sup>+</sup> T cells                                                                                           | 0.208    |                 |
| 1J                                                         | CD8 <sup>+</sup> PD-1 <sup>+</sup> T cells/ml                                                                                          | 0.144    | 0.167           |
| 1K                                                         | CD8 <sup>+</sup> PD-1 MFI                                                                                                              | 0.303    |                 |
| 2A                                                         | % Foxp3 <sup>+</sup> Tregs                                                                                                             | 0.018    |                 |
| 2B                                                         | Foxp3 <sup>+</sup> Tregs/ml                                                                                                            | 0.050    | 0.167           |
| 2C                                                         | CD4 <sup>+</sup> CD127 <sup>+</sup> T cells :<br>CD4 <sup>+</sup> Foxp3 <sup>+</sup> T cells ratio                                     | 0.018    | 0.108           |
| 2D                                                         | % CD4 <sup>+</sup> CTLA-4 <sup>+</sup> Tregs                                                                                           | 0.015    |                 |
| 2E                                                         | CD4 <sup>+</sup> CTLA-4 <sup>+</sup> Tregs/ml                                                                                          | 0.050    | 0.167           |
| 2F                                                         | % CD11b <sup>+</sup> CD33 <sup>+</sup> MDSC                                                                                            | 0.616    |                 |
| 2G                                                         | CD11b <sup>+</sup> CD33 <sup>+</sup> MDSC/ml                                                                                           | 0.910    |                 |
| Outcome: Mean Difference. Comparison: In vitro Post vs Pre |                                                                                                                                        |          |                 |
| 3A                                                         | %CD4 <sup>+</sup> CD127 <sup>+</sup> PD-1 <sup>+</sup> T cells                                                                         | 0.002    | 0.032           |
| 3B                                                         | %CD4 <sup>+</sup> CD127 <sup>+</sup> PD-1 <sup>-</sup> T cells                                                                         | 0.003    | 0.048           |
| 3C                                                         | %CD4 <sup>+</sup> CD127 <sup>+</sup> Foxp3 <sup>+</sup> T cells                                                                        | 0.001    | 0.027           |
| 3D                                                         | %CD127 <sup>+</sup> Foxp3 <sup>+</sup> CTLA-4 <sup>+</sup> T cells                                                                     | 0.007    | 0.073           |
| 3E                                                         | %CD4 <sup>+</sup> IFN- $\gamma$ <sup>+</sup> T cells                                                                                   | 0.002    | 0.041           |
| 3F                                                         | %CD8 <sup>+</sup> IFN- $\gamma$ <sup>+</sup> T cells                                                                                   | 0.003    | 0.044           |
| 3G                                                         | %CD4 <sup>+</sup> PD-1 <sup>+</sup> VEGFR-2 <sup>+</sup> T cells                                                                       | 0.009    | 0.078           |
| 3H                                                         | %CD8 <sup>+</sup> PD-1 <sup>+</sup> VEGFR-2 <sup>+</sup> T cells                                                                       | 0.004    | 0.054           |
| Outcome: Overall Survival. Comparison: In vivo Post vs Pre |                                                                                                                                        |          |                 |
| 4A                                                         | CD4 <sup>+</sup> PD-1 <sup>+</sup> T cells/ml                                                                                          | 0.037    | 0.148           |
| 4B                                                         | CD8 <sup>+</sup> PD-1 <sup>+</sup> T cells/ml                                                                                          | 0.039    | 0.155           |
| 4C                                                         | MFI CD8 <sup>+</sup> PD-1 <sup>+</sup> T cells                                                                                         | 0.035    | 0.140           |
| 4D                                                         | CD4 <sup>+</sup> Foxp3 <sup>+</sup> Tregs/m                                                                                            | 0.005    | 0.067           |
| 4E                                                         | %CD4 <sup>+</sup> CD127 <sup>+</sup> T cells                                                                                           | 0.002    | 0.041           |

**Outcome: Overall Survival. Comparison: In vivo Pre  
(Predictive Markers)**

|    |                                                 |       |       |
|----|-------------------------------------------------|-------|-------|
| 5A | CD4 <sup>+</sup> PD-1 <sup>+</sup> T cells/ml   | 0.055 | 0.167 |
| 5B | CD8 <sup>+</sup> PD-1 <sup>+</sup> T cells/ml   | 0.048 | 0.167 |
| 5C | %CD4 <sup>+</sup> Foxp3 <sup>+</sup> T cells    | 0.013 | 0.094 |
| 5D | Foxp3 <sup>+</sup> PD-1 <sup>+</sup> T cells/ml | 0.010 | 0.082 |
| 5E | T eff : Foxp3 <sup>+</sup> Treg ratio           | 0.012 | 0.088 |

Nominal p values for 36 comparisons were indicated in the manuscript. Of these, 26 comparisons were considered important to the central premise of the manuscript. The p values for these comparisons were adjusted for multiplicity using Hommel's method to maintain a family-wise type I error rate of 0.05. This adjustment identified six comparisons with nominal p values less than 0.003 as statistically significant.
